# Supplementary material for: Characterization and toxicity of citral incorporated with nanostructured lipid carrier
Source: PeerJ. 2018 Jan 4;6:e3916. doi: 10.7717/peerj.3916 (PMC5756616; doi:10.7717/peerj.3916)
Supplement: Data S1 [file peerj-06-3916-s001.xlsx]

## Sheet: Table 2
	Group	Mortality	Body weight	Toxic sign	ALT (U/L)	ALP (U/L)	AST (U/L)	CREAT (µmol/L)
	NLC-BLANK	NONE	NONE	NONE	75.2	230	348	49
	NLC-CITRAL	NONE	NONE	NONE	76.1	225	351.9	47
	CITRAL	NONE	NONE	NONE	71.5	232	359	47

## Sheet: Table 1
	Zeta potential			Zeta sizer		EE
R1	-13.25		R1	55.65		494.5/500 X 100=98.90%
R2	-11.98		R2	52.97
R3	-12.54		R3	53.76
Average	-12.59		Average	54.127
SD	0.519679		SD	1.1244

## Sheet: Fig 2
		NLC-citral	Citral
	0	0	0
	0.5	1.88238	19.854
	1	5.8778	39.2
	2	12.3498	56.35
	4	21.2057	76.34
	6	30.6858	87.98
	8	40.9094	99.89
	10	51.805
	12	63.1517
	24	79.2525
	48	96.3106

## Sheet: Fig 3
	CONC	NLC-Blank	NLC-Citral	Citral
	0	100	100	100
	0.47	105	103.87	101.53
	0.94	104.251	102	101
	1.88	102	100.97	101.26
	3.75	103.846	101.88	100
	7.5	102	101	99.4
	15	102.564	99.29	99.67
	30	99.5951	99.81	95.14

## Sheet: Fig 4
		AVERAGE	STDEV
	NLC-BLANK	98.6533	0.16297
	NLC-CITRAL	37.5327	0.0112533
	CIT	45.7865	0.0049867

## Sheet: Fig 6
		CD4/CD3			CD8/CD3
		AVERAGE	STDEV		AVERAGE	STDEV
	NLC-BLANK	13.97	0.1925	NLC-BLANK	5.63	0.1985
	NLC-CITRAL	20.12	0.411253	NLC-CITRA	9.56	0.321253
	CIT	18.44	0.498668	CIT	8.82	0.158668
